# Supplementary material for: Determinants of Disease Presentation and Outcome during Cryptococcosis: The CryptoA/D Study
Source: PLoS Med. 2007 Feb 6;4(2):e21. doi: 10.1371/journal.pmed.0040021 (PMC1808080; doi:10.1371/journal.pmed.0040021)
Supplement: Table S2 — (20 KB XLS) [file pmed.0040021.st002.xls]

## Sheet: Feuil2
Table S2: Additional comparison of HIV-infection according to gender in 177 HIV-infected patients with cryptococcosis
Parameter	Male patients	Female patients	P
	(n = 142)	(n = 35)
Cryptococcosis revealing HIV infection, %	55.6	57.1	0.749
AIDS-defining illness, %	64.1	68.6	0.695
Mode of contamination
Homo/bisexuals	47.7	-
Heterosexuals	40.8	90.6
Intravenous drug addiction	10.8	6.2
Mean CD4+ T cells counts/mm3 ± SD	46.3 ± 5.9	39.8 ± 7.5	0.602
Mean viral load (log cp/ml) ± SD	5.0 ± 0.1	4.8 ± 0.2	0.267
Antiretroviral treatment at baseline	39.4	42.9	0.705
